# Supplementary material for: Association Between Plasma Metabolites and Psychometric Scores Among Children With Developmental Disabilities: Investigating Sex-Differences
Source: Front Psychiatry. 2020 Dec 22;11:579538. doi: 10.3389/fpsyt.2020.579538 (PMC7783080; doi:10.3389/fpsyt.2020.579538)
Supplement: Supplementary file 3 [file Table_3.xlsx]

## Sheet: VABS
Supplementary Table 3: Results of multiple linear regression (MLR) analysis predicing VABS subscale scores based on log-transformed plasma metbolite concentrations after adjusting for child’s neurodevelopmental diagnosis (ASD, i-DD and DS cases to TD controls (reference)), child’s sex (male, female (reference), child’s race/ethnicity (Hispanic, other, white (reference)), maternal age at child's b…
		Communication Skills						Daily Living Skills						Socilization Skills						Motor Skills						VABS Composite Score
Pathway	Metabolite	Estimate	Error	t Value	Pr > |t|	95% Confidence Limits	95% Confidence Limits	β	Standard Error	t Value	p-value	95% CI (lower bounds)	95% CI (upper bounds)	β	Standard Error	t Value	p-value	95% CI (lower bounds)	95% CI (upper bounds)	β	Standard Error	t Value	p-value	95% CI (lower bounds)	95% CI (upper bounds)	β	Standard Error	t Value	p-value	95% CI (lower bounds)	95% CI (upper bounds)
Amino acids and their metabolites	2-Aminobutyrate	-7.13566	7.50317	-0.95	0.3421	-21.883	7.6117	2.93235	6.61205	0.44	0.6576	-10.0635	15.9282	-6.76007	7.57367	-0.89	0.3726	-21.646	8.12586	-0.921823	7.37145	-0.13	0.9005	-15.4103	13.5666	-2.78453	5.85002	-0.48	0.6343	-14.2826	8.71358
	2-Hydroxybutyrate	-4.69193	4.73014	-0.99	0.3218	-13.989	4.60509	1.75418	4.16884	0.42	0.6741	-6.43962	9.94797	-1.39538	4.77897	-0.29	0.7704	-10.7884	7.99759	-5.15816	4.64097	-1.11	0.267	-14.2799	3.96359	-2.73282	3.68692	-0.74	0.459	-9.9794	4.51376
	2-Hydroxyisovalerate	-11.7792	6.68454	-1.76	0.0788	-24.9175	1.35919	-6.22388	5.89937	-1.06	0.292	-17.819	5.37124	-5.05236	6.76639	-0.75	0.4557	-18.3516	8.24687	-7.23811	6.57478	-1.1	0.2716	-20.1607	5.68451	-7.47911	5.21396	-1.43	0.1522	-17.7271	2.76884
	3-Hydroxyisobutyrate	0.182475	4.84604	0.04	0.97	-9.34233	9.70728	6.47851	4.25557	1.52	0.1287	-1.88575	14.8428	0.989651	4.89073	0.2	0.8397	-8.62301	10.6023	-2.21817	4.75487	-0.47	0.6411	-11.5638	7.12744	1.22764	3.7749	0.33	0.7452	-6.19185	8.64714
	3-Methyl-2-oxovalerate	-1.98502	6.58339	-0.3	0.7632	-14.9246	10.9545	8.11761	5.78416	1.4	0.1612	-3.25106	19.4863	-7.92756	6.63413	-1.19	0.2328	-20.9668	5.11172	-2.03499	6.46109	-0.31	0.7529	-14.7342	10.6642	-0.105569	5.12939	-0.02	0.9836	-10.1873	9.97617
	Alanine	2.39056	9.46159	0.25	0.8007	-16.206	20.9872	2.60024	8.33072	0.31	0.7551	-13.7737	18.9741	-1.3698	9.54978	-0.14	0.886	-20.1397	17.4001	12.2869	9.26772	1.33	0.1856	-5.92863	30.5025	2.92233	7.37035	0.4	0.6919	-11.564	17.4086
	Arginine	-3.48526	5.93363	-0.59	0.5573	-15.1477	8.1772	9.38977	5.20712	1.8	0.072	-0.844739	19.6243	-0.658197	5.99095	-0.11	0.9126	-12.4333	11.1169	5.69851	5.81932	0.98	0.328	-5.73927	17.1363	2.44471	4.62301	0.53	0.5972	-6.64173	11.5312
	Asparagine	4.18852	7.27667	0.58	0.5652	-10.1137	18.4907	1.32443	6.40934	0.21	0.8364	-11.273	13.9219	-2.78549	7.34572	-0.38	0.7047	-17.2234	11.6524	2.29844	7.14345	0.32	0.7478	-11.7419	16.3388	1.10749	5.67089	0.2	0.8453	-10.0386	12.2535
	Betaine	-8.62042	7.8355	-1.1	0.2719	-24.021	6.78011	-6.04261	6.9028	-0.88	0.3819	-19.6099	7.52472	-5.21473	7.91524	-0.66	0.5104	-20.772	10.3425	-13.4152	7.67364	-1.75	0.0811	-28.4976	1.66724	-8.40667	6.09946	-1.38	0.1688	-20.3951	3.58172
	Carnitine	-2.18521	10.8585	-0.2	0.8406	-23.5275	19.1571	-13.7197	9.53866	-1.44	0.1511	-32.4678	5.0284	-1.08493	10.9596	-0.1	0.9212	-22.6258	20.456	5.32952	10.6543	0.5	0.6172	-15.6114	26.2704	-3.65658	8.45802	-0.43	0.6657	-20.2807	12.9675
	Glutamate	-4.54799	3.93279	-1.16	0.2481	-12.2778	3.18184	0.379892	3.46819	0.11	0.9128	-6.43677	7.19656	-1.2221	3.97496	-0.31	0.7587	-9.03482	6.59063	2.7634	3.86346	0.72	0.4748	-4.83017	10.357	-1.32084	3.06797	-0.43	0.667	-7.35089	4.7092
	Glutamine	4.16614	5.97224	0.7	0.4858	-7.5722	15.9045	-2.1483	5.26058	-0.41	0.6832	-12.4879	8.19127	-7.06823	6.02138	-1.17	0.2411	-18.9032	4.76669	-13.2727	5.82971	-2.28	0.0233	-24.7309	-1.81454	-4.02477	4.65132	-0.87	0.3874	-13.1669	5.11732
	Glycine	3.76949	8.92258	0.42	0.6729	-13.7677	21.3067	-0.830768	7.85796	-0.11	0.9159	-16.2755	14.6139	3.93159	9.00516	0.44	0.6626	-13.7679	21.6311	2.0417	8.75817	0.23	0.8158	-15.1723	19.2557	1.7206	6.95217	0.25	0.8046	-11.9438	15.385
	Histidine	7.45212	9.43121	0.79	0.4299	-11.0848	25.989	9.14534	8.29862	1.1	0.2711	-7.16545	25.4561	-2.11895	9.52497	-0.22	0.8241	-20.8401	16.6022	3.42846	9.26132	0.37	0.7114	-14.7745	21.6314	3.68781	7.35065	0.5	0.6161	-10.7598	18.1354
	Isoleucine	-1.16752	6.64951	-0.18	0.8607	-14.237	11.902	11.5639	5.82863	1.98	0.0479	0.107819	23.02	-9.37773	6.69617	-1.4	0.1621	-22.5389	3.78348	3.03233	6.52464	0.46	0.6423	-9.79176	15.8564	1.67483	5.17992	0.32	0.7466	-8.50623	11.8559
	Leucine	-2.45979	7.67403	-0.32	0.7487	-17.543	12.6234	11.3887	6.73558	1.69	0.0916	-1.85001	24.6273	-12.0501	7.72431	-1.56	0.1195	-27.2321	3.13194	0.287278	7.53243	0.04	0.9696	-14.5176	15.0921	0.0022189	5.97924	0	0.9997	-11.7499	11.7543
	Lysine	-1.83464	7.75689	-0.24	0.8131	-17.0807	13.4114	5.08499	6.82609	0.74	0.4567	-8.33156	18.5016	-13.7515	7.80123	-1.76	0.0787	-29.0847	1.58166	5.70577	7.6084	0.75	0.4537	-9.24841	20.66	-1.12983	6.04323	-0.19	0.8518	-13.0077	10.748
	Methionine	-0.751458	5.41632	-0.14	0.8897	-11.3971	9.89423	7.19631	4.75663	1.51	0.131	-2.15276	16.5454	-7.77015	5.45382	-1.42	0.155	-18.4896	2.94925	3.75758	5.31279	0.71	0.4798	-6.68463	14.1998	1.06044	4.21942	0.25	0.8017	-7.23277	9.35364
	N,N-Dimethylglycine	-6.7292	5.97405	-1.13	0.2606	-18.4711	5.0127	-0.849735	5.2678	-0.16	0.8719	-11.2035	9.50404	-13.1613	6.00492	-2.19	0.0289	-24.9639	-1.35872	-7.3697	5.86101	-1.26	0.2093	-18.8894	4.15002	-6.75094	4.64963	-1.45	0.1472	-15.8897	2.38783
	O-Acetylcarnitine	-9.53788	5.63109	-1.69	0.091	-20.6057	1.52993	-0.566036	4.97464	-0.11	0.9095	-10.3436	9.21154	-0.0344907	5.70217	-0.01	0.9952	-11.242	11.173	-3.66139	5.54209	-0.66	0.5092	-14.5543	7.2315	-3.42742	4.39843	-0.78	0.4363	-12.0725	5.21763
	Ornithine	-14.0084	6.79492	-2.06	0.0398	-27.3636	-0.653056	-8.12366	5.99969	-1.35	0.1764	-19.9159	3.66862	-21.3326	6.8146	-3.13	0.0019	-34.7266	-7.93863	-13.5858	6.66953	-2.04	0.0423	-26.6947	-0.477005	-13.8301	5.27781	-2.62	0.0091	-24.2035	-3.45663
	Phenylalanine	-5.11656	9.65397	-0.53	0.5964	-24.0913	13.8582	8.16064	8.49411	0.96	0.3372	-8.53439	24.8557	-10.1091	9.73446	-1.04	0.2996	-29.242	9.02379	-8.19815	9.46958	-0.87	0.3871	-26.8104	10.4141	-3.87667	7.52115	-0.52	0.6065	-18.6594	10.906
	Proline	-3.16596	6.95998	-0.45	0.6494	-16.8457	10.5138	3.42162	6.1276	0.56	0.5769	-8.62208	15.4653	-9.89146	7.01001	-1.41	0.159	-23.6695	3.8866	0.831076	6.83227	0.12	0.9032	-12.5976	14.2598	-2.33124	5.42238	-0.43	0.6675	-12.9888	8.32636
	Serine	-2.24813	10.3358	-0.22	0.8279	-22.563	18.0667	12.4628	9.08148	1.37	0.1707	-5.38668	30.3123	-10.1751	10.4207	-0.98	0.3294	-30.6567	10.3066	13.2784	10.1243	1.31	0.1904	-6.62067	33.1775	3.16703	8.05121	0.39	0.6942	-12.6575	18.9916
	Taurine	-4.1336	8.27424	-0.5	0.6176	-20.3965	12.1293	-1.86234	7.28712	-0.26	0.7984	-16.1851	12.4604	-4.06973	8.35106	-0.49	0.6263	-20.4836	12.3441	-6.58473	8.11677	-0.81	0.4177	-22.5381	9.36864	-5.20805	6.44311	-0.81	0.4194	-17.8719	7.45578
	Threonine	-1.3838	7.66308	-0.18	0.8568	-16.4455	13.6778	9.46924	6.73225	1.41	0.1603	-3.76289	22.7014	-6.00624	7.72899	-0.78	0.4375	-21.1974	9.18496	0.150501	7.52107	0.02	0.984	-14.632	14.933	0.702927	5.97013	0.12	0.9063	-11.0313	12.4371
	Tryptophan	-0.20106	3.70073	-0.05	0.9567	-7.47479	7.07267	1.57388	3.25767	0.48	0.6292	-4.82901	7.97677	1.15862	3.73463	0.31	0.7565	-6.18174	8.49898	-0.666201	3.63189	-0.18	0.8545	-7.80462	6.47222	0.740651	2.88288	0.26	0.7974	-4.92561	6.40691
	Tyrosine	-1.92432	6.87565	-0.28	0.7797	-15.4383	11.5897	11.0213	6.03132	1.83	0.0683	-0.833126	22.8758	-11.6002	6.91748	-1.68	0.0943	-25.1964	1.99602	0.70557	6.74851	0.1	0.9168	-12.5585	13.9697	0.148714	5.35702	0.03	0.9779	-10.3804	10.6779
	Urea	4.61616	6.78218	0.68	0.4965	-8.7141	17.9464	5.21008	5.96972	0.87	0.3833	-6.52331	16.9435	3.63932	6.84648	0.53	0.5953	-9.81732	17.096	1.19313	6.65958	0.18	0.8579	-11.8962	14.2824	3.44964	5.28395	0.65	0.5142	-6.93587	13.8352
	Valine	3.8623	8.19549	0.47	0.6377	-12.2458	19.9704	15.1465	7.18112	2.11	0.0355	1.03214	29.2609	-4.24333	8.27107	-0.51	0.6082	-20.5	12.0133	3.52687	8.0436	0.44	0.6613	-12.2827	19.3364	5.47353	6.38098	0.86	0.3915	-7.06818	18.0152
	trans-4-Hydroxy-L-proline	0.281179	7.04981	0.04	0.9682	-13.5751	14.1375	0.103524	6.20745	0.02	0.9867	-12.0971	12.3042	1.62834	7.11474	0.23	0.8191	-12.3556	15.6122	1.61556	6.91849	0.23	0.8155	-11.9826	15.2137	0.639695	5.49215	0.12	0.9073	-10.155	11.4344
Ketone Body	3-Hydroxybutyrate	0.614548	2.64418	0.23	0.8163	-4.58254	5.81164	5.13228	2.31522	2.22	0.0272	0.581757	9.68279	1.08482	2.66835	0.41	0.6845	-4.15977	6.3294	-1.74006	2.59389	-0.67	0.5027	-6.83831	3.35819	1.45816	2.05891	0.71	0.4792	-2.58858	5.50491
	Acetoacetate	1.85328	1.94843	0.95	0.3421	-1.97632	5.68289	2.06234	1.71454	1.2	0.2297	-1.30755	5.43224	2.55517	1.9647	1.3	0.1941	-1.30642	6.41676	-0.302801	1.9142	-0.16	0.8744	-4.06513	3.45953	1.57333	1.51764	1.04	0.3005	-1.40957	4.55624
	Acetone	-1.16315	6.01513	-0.19	0.8468	-12.9858	10.6595	0.157102	5.29662	0.03	0.9764	-10.2533	10.5675	6.14395	6.06394	1.01	0.3115	-5.77461	18.0625	-12.2947	5.87392	-2.09	0.0369	-23.8398	-0.749632	-1.3566	4.6859	-0.29	0.7723	-10.5666	7.85345
TCA	2-Oxoglutarate	-3.00042	5.48423	-0.55	0.5846	-13.7796	7.77874	-2.15148	4.8295	-0.45	0.6562	-11.6438	7.34082	-3.5336	5.53437	-0.64	0.5235	-14.4113	7.34412	0.0958677	5.38427	0.02	0.9858	-10.4868	10.6786	-2.2628	4.27264	-0.53	0.5967	-10.6606	6.135
	cis-Aconitate	-5.35197	5.06442	-1.06	0.2912	-15.306	4.60205	-3.50868	4.46185	-0.79	0.4321	-12.2784	5.26102	-2.57838	5.11647	-0.5	0.6146	-12.6347	7.47796	-0.2452	4.97681	-0.05	0.9607	-10.027	9.53663	-3.72808	3.94651	-0.94	0.3454	-11.4849	4.02872
	Fumarate	-5.09488	5.94595	-0.86	0.392	-16.7816	6.59179	-2.16511	5.2389	-0.41	0.6796	-12.4621	8.13187	-5.52573	6.00028	-0.92	0.3576	-17.3192	6.26772	1.60389	5.84001	0.27	0.7837	-9.87456	13.0823	-2.76755	4.63428	-0.6	0.5507	-11.8762	6.34106
	Succinate	-7.64639	5.74698	-1.33	0.1841	-18.942	3.6492	-10.0331	5.04758	-1.99	0.0475	-19.9541	-0.112175	-6.92749	5.80257	-1.19	0.2332	-18.3323	4.47736	-4.55833	5.64758	-0.81	0.42	-15.6586	6.54189	-7.45139	4.47205	-1.67	0.0964	-16.2411	1.33835
Creatine/ Creatinine	Creatine	-12.2734	8.68661	-1.41	0.1584	-29.3468	4.79995	-10.3634	7.65008	-1.35	0.1762	-25.3995	4.67269	-9.13641	8.77638	-1.04	0.2984	-26.3862	8.11343	-5.17892	8.5414	-0.61	0.5446	-21.9669	11.6091	-11.1973	6.76157	-1.66	0.0984	-24.487	2.09247
	Creatinine	8.72491	11.6174	0.75	0.453	-14.1089	31.5587	13.4636	10.2154	1.32	0.1882	-6.61459	33.5417	18.9279	11.6973	1.62	0.1064	-4.06289	41.9187	5.8813	11.4056	0.52	0.6064	-16.5363	28.2989	10.5938	9.04217	1.17	0.242	-7.17847	28.366
Glycolysis	Lactate	-7.61969	4.7973	-1.59	0.1129	-17.0487	1.80932	-9.32361	4.21255	-2.21	0.0274	-17.6033	-1.04391	-10.1411	4.83128	-2.1	0.0364	-19.6369	-0.645276	-6.7293	4.71084	-1.43	0.1539	-15.9884	2.52979	-8.93017	3.72354	-2.4	0.0169	-16.2487	-1.61161
	Pyruvate	-1.99116	3.22428	-0.62	0.5372	-8.32842	4.3461	-5.23388	2.82906	-1.85	0.065	-10.7943	0.326588	-3.14117	3.25209	-0.97	0.3346	-9.53309	3.25075	-5.38364	3.15517	-1.71	0.0887	-11.5851	0.817797	-3.41303	2.50763	-1.36	0.1742	-8.34174	1.51568
Others	Acetate	-0.748063	3.53607	-0.21	0.8326	-7.69816	6.20203	2.40583	3.11156	0.77	0.4398	-3.70989	8.52155	2.08063	3.56763	0.58	0.5601	-4.93148	9.09275	6.13205	3.45801	1.77	0.0769	-0.664604	12.9287	2.33099	2.75267	0.85	0.3976	-3.07933	7.74132
	Choline	-6.56708	8.26295	-0.79	0.4272	-22.8078	9.67361	-4.51641	7.2777	-0.62	0.5352	-18.8206	9.78779	-9.50929	8.33307	-1.14	0.2544	-25.8878	6.86922	-1.49745	8.11515	-0.18	0.8537	-17.4476	14.4527	-6.25006	6.43501	-0.97	0.332	-18.898	6.39784
	Dimethyl Sulfone	5.32721	4.59741	1.16	0.2472	-3.70892	14.3633	3.23451	4.05138	0.8	0.4251	-4.72841	11.1974	3.98339	4.64329	0.86	0.3914	-5.14291	13.1097	5.51171	4.51127	1.22	0.2225	-3.35511	14.3785	4.74059	3.57996	1.32	0.1861	-2.29575	11.7769
	Formate	-9.59603	7.96699	-1.2	0.2291	-25.255	6.06296	1.33716	7.02653	0.19	0.8492	-12.4734	15.1477	-2.93142	8.05313	-0.36	0.716	-18.7597	12.8969	-1.41763	7.83192	-0.18	0.8564	-16.8111	13.9759	-1.7137	6.21665	-0.28	0.7829	-13.9324	10.505
	Glycolate	-9.79482	7.99397	-1.23	0.2211	-25.5068	5.91719	2.7153	7.04982	0.39	0.7003	-11.141	16.5716	-4.33601	8.07941	-0.54	0.5918	-20.216	11.5439	-0.132467	7.85919	-0.02	0.9866	-15.5796	15.3146	-1.47801	6.23821	-0.24	0.8128	-13.7391	10.7831
	Hypoxanthine	0.482883	2.26293	0.21	0.8311	-3.96488	4.93064	1.50396	1.99133	0.76	0.4505	-2.40996	5.41788	0.598585	2.28385	0.26	0.7934	-3.89028	5.08745	1.2254	2.22025	0.55	0.5813	-3.13847	5.58926	0.675799	1.76275	0.38	0.7016	-2.78887	4.14046
	myo Inositol	-2.15981	6.96883	-0.31	0.7568	-15.8569	11.5373	0.945238	6.13665	0.15	0.8777	-11.1162	13.0067	-3.66947	7.03199	-0.52	0.6021	-17.4907	10.1518	-6.26182	6.83355	-0.92	0.36	-19.693	7.1694	-3.42439	5.42724	-0.63	0.5284	-14.0915	7.24275
