# Supplementary material for: Association Between Plasma Metabolites and Psychometric Scores Among Children With Developmental Disabilities: Investigating Sex-Differences
Source: Front Psychiatry. 2020 Dec 22;11:579538. doi: 10.3389/fpsyt.2020.579538 (PMC7783080; doi:10.3389/fpsyt.2020.579538)
Supplement: Supplementary file 4 [file Table_4.xlsx]

## Sheet: ABC
Supplementary Table 4: Results of multiple linear regression (MLR) analysis predicing ABC subscale scores based on log-transformed plasma metbolite concentrations after adjusting for child’s neurodevelopmental diagnosis (ASD, i-DD and DS cases to TD controls (reference)), child’s sex (male, female (reference), child’s race/ethnicity (Hispanic, other, white (reference)), maternal age at child's bi…
		Irritability, agitation, crying						Lethargy, social withdrawal						Stereotypic behavior						Hyperactivity, noncompliance						Inappropriate speech
Pathway	Metabolite	Estimate	Error	t Value	Pr > |t|	95% Confidence Limits	95% Confidence Limits	β	Standard Error	t Value	p-value	95% CI (lower bounds)	95% CI (upper bounds)	β	Standard Error	t Value	p-value	95% CI (lower bounds)	95% CI (upper bounds)	β	Standard Error	t Value	p-value	95% CI (lower bounds)	95% CI (upper bounds)	β	Standard Error	t Value	p-value	95% CI (lower bounds)	95% CI (upper bounds)
Amino acids and their metabolites	2-Aminobutyrate	0.690091	2.40231	0.29	0.7741	-4.03161	5.4118	-1.21047	1.56247	-0.77	0.4389	-4.28147	1.86053	-0.0177872	1.00392	-0.02	0.9859	-1.99098	1.9554	0.764394	2.98143	0.26	0.7978	-5.09556	6.62434	0.0791205	0.696002	0.11	0.9095	-1.28886	1.4471
	2-Hydroxybutyrate	0.519962	1.51454	0.34	0.7315	-2.45684	3.49677	-0.838764	0.984956	-0.85	0.3949	-2.77468	1.09715	0.117284	0.632924	0.19	0.8531	-1.12672	1.36129	0.535359	1.87969	0.28	0.7759	-3.15914	4.22986	-0.00329872	0.43882	-0.01	0.994	-0.865793	0.859195
	2-Hydroxyisovalerate	0.839542	2.14548	0.39	0.6958	-3.37736	5.05645	1.71244	1.39407	1.23	0.22	-1.02758	4.45246	1.36685	0.894244	1.53	0.1271	-0.390774	3.12447	2.64491	2.66005	0.99	0.3206	-2.58339	7.8732	-0.171886	0.621597	-0.28	0.7823	-1.39363	1.04985
	3-Hydroxyisobutyrate	-0.218324	1.55006	-0.14	0.8881	-3.26494	2.82829	-0.593092	1.00838	-0.59	0.5567	-2.57505	1.38887	0.437498	0.647376	0.68	0.4995	-0.834909	1.7099	0.429539	1.92362	0.22	0.8234	-3.35131	4.21039	-0.0781896	0.449044	-0.17	0.8618	-0.960779	0.8044
	3-Methyl-2-oxovalerate	-2.39557	2.10287	-1.14	0.2553	-6.52873	1.73759	-1.54978	1.36856	-1.13	0.2581	-4.23966	1.14009	-0.489588	0.879708	-0.56	0.5781	-2.21864	1.23946	-1.88412	2.61211	-0.72	0.4711	-7.01817	3.24993	-0.437396	0.609752	-0.72	0.4736	-1.63585	0.761061
	Alanine	-1.54294	3.02577	-0.51	0.6104	-7.49004	4.40417	1.24927	1.96882	0.63	0.5261	-2.62041	5.11895	-0.272546	1.26465	-0.22	0.8295	-2.7582	2.21311	0.355801	3.7562	0.09	0.9246	-7.02696	7.73856	0.306959	0.876701	0.35	0.7264	-1.41618	2.0301
	Arginine	0.0806825	1.89873	0.04	0.9661	-3.65125	3.81261	-1.76359	1.23276	-1.43	0.1533	-4.18656	0.659376	0.201206	0.793343	0.25	0.7999	-1.3581	1.76051	1.35362	2.35551	0.57	0.5658	-3.2761	5.98335	-0.305602	0.549865	-0.56	0.5787	-1.38635	0.775148
	Asparagine	1.54939	2.32727	0.67	0.5059	-3.02482	6.12361	1.1079	1.51441	0.73	0.4648	-1.86865	4.08444	1.02432	0.971717	1.05	0.2924	-0.885577	2.93421	1.67151	2.88861	0.58	0.5631	-4.00599	7.34902	-0.273702	0.674425	-0.41	0.6851	-1.59927	1.05187
	Betaine	4.08395	2.50212	1.63	0.1034	-0.833926	9.00182	1.51931	1.63174	0.93	0.3523	-1.68786	4.72647	0.303318	1.04865	0.29	0.7725	-1.7578	2.36443	2.71905	3.11207	0.87	0.3828	-3.39766	8.83576	0.394216	0.726849	0.54	0.5878	-1.03439	1.82283
	Carnitine	-1.70355	3.47249	-0.49	0.624	-8.52867	5.12158	-3.00552	2.25586	-1.33	0.1835	-7.43937	1.42833	-1.293	1.45008	-0.89	0.3731	-4.1431	1.5571	-3.30989	4.30777	-0.77	0.4427	-11.7767	5.15695	-1.59097	1.00333	-1.59	0.1135	-3.56301	0.381069
	Glutamate	-0.155778	1.2599	-0.12	0.9017	-2.63209	2.32054	0.262736	0.819849	0.32	0.7488	-1.34866	1.87414	-0.366656	0.526172	-0.7	0.4863	-1.40084	0.667527	1.69989	1.56147	1.09	0.2769	-1.36916	4.76894	0.582047	0.36392	1.6	0.1105	-0.133231	1.29733
	Glutamine	0.878837	1.91094	0.46	0.6458	-2.87708	4.63475	-1.07682	1.24284	-0.87	0.3867	-3.51961	1.36597	0.606358	0.798161	0.76	0.4479	-0.962415	2.17513	-1.60806	2.37087	-0.68	0.498	-6.26797	3.05185	-0.846513	0.552228	-1.53	0.126	-1.93191	0.238882
	Glycine	5.28083	2.84328	1.86	0.064	-0.307589	10.8693	1.47644	1.85641	0.8	0.4269	-2.1723	5.12519	1.27317	1.19125	1.07	0.2858	-1.06822	3.61456	4.90924	3.53483	1.39	0.1656	-2.0384	11.8569	0.766014	0.826161	0.93	0.3543	-0.857792	2.38982
	Histidine	0.948051	3.01858	0.31	0.7536	-4.98492	6.88102	1.09918	1.96398	0.56	0.576	-2.76098	4.95934	1.29747	1.25993	1.03	0.3037	-1.1789	3.77385	1.85863	3.74554	0.5	0.62	-5.50318	9.22043	0.0191046	0.874578	0.02	0.9826	-1.69986	1.73807
	Isoleucine	-0.516698	2.1269	-0.24	0.8082	-4.69708	3.66368	-1.45192	1.38249	-1.05	0.2942	-4.16919	1.26534	-0.108992	0.888785	-0.12	0.9025	-1.85588	1.6379	0.350312	2.63969	0.13	0.8945	-4.83796	5.53859	0.876143	0.614754	1.43	0.1548	-0.332145	2.08443
	Leucine	-1.94203	2.45319	-0.79	0.429	-6.76373	2.87967	-2.23966	1.59403	-1.41	0.1607	-5.37269	0.893375	-0.520627	1.02552	-0.51	0.6119	-2.53627	1.49502	-0.85595	3.04644	-0.28	0.7789	-6.84368	5.13178	0.428247	0.710902	0.6	0.5472	-0.969019	1.82551
	Lysine	-2.81182	2.47764	-1.13	0.2571	-7.68159	2.05794	-0.803214	1.61437	-0.5	0.6191	-3.97624	2.36981	0.0408813	1.03685	0.04	0.9686	-1.99702	2.07879	0.720224	3.07926	0.23	0.8152	-5.332	6.77245	0.31628	0.71868	0.44	0.6601	-1.09627	1.72883
	Methionine	-0.737967	1.73218	-0.43	0.6703	-4.14254	2.66661	0.0940237	1.12752	0.08	0.9336	-2.12209	2.31014	0.23737	0.723868	0.33	0.7431	-1.18538	1.66012	-0.165764	2.15015	-0.08	0.9386	-4.39185	4.06032	0.254746	0.501766	0.51	0.6119	-0.731468	1.24096
	N,N-Dimethylglycine	1.55853	1.91224	0.82	0.4155	-2.19995	5.31702	-0.184542	1.2454	-0.15	0.8823	-2.63235	2.26327	1.06796	0.798005	1.34	0.1815	-0.50051	2.63642	4.22447	2.36627	1.79	0.0749	-0.426396	8.87534	0.498623	0.553881	0.9	0.3685	-0.59002	1.58727
	O-Acetylcarnitine	1.18361	1.80629	0.66	0.5126	-2.36662	4.73384	-2.54865	1.16968	-2.18	0.0299	-4.84763	-0.249664	-0.980284	0.75367	-1.3	0.1941	-2.46161	0.501042	-0.587929	2.24262	-0.26	0.7933	-4.99576	3.8199	0.15609	0.523486	0.3	0.7657	-0.872814	1.18499
	Ornithine	-3.55922	2.17743	-1.63	0.1029	-7.83892	0.720475	-3.18297	1.41314	-2.25	0.0248	-5.96048	-0.405465	-0.537692	0.912303	-0.59	0.5559	-2.33081	1.25542	-1.46785	2.70972	-0.54	0.5883	-6.79376	3.85806	0.715116	0.631812	1.13	0.2583	-0.526699	1.95693
	Phenylalanine	-4.60711	3.08102	-1.5	0.1356	-10.6628	1.44858	-2.86653	2.00555	-1.43	0.1536	-6.8084	1.07534	-0.804357	1.29018	-0.62	0.5333	-3.34019	1.73147	-0.208957	3.83357	-0.05	0.9566	-7.74377	7.32586	-0.284249	0.894774	-0.32	0.7509	-2.04291	1.47441
	Proline	-2.82768	2.22264	-1.27	0.204	-7.19624	1.54088	-1.48097	1.44743	-1.02	0.3068	-4.32587	1.36393	0.151112	0.930461	0.16	0.8711	-1.67769	1.97992	-0.151993	2.76355	-0.05	0.9562	-5.58371	5.27973	0.26361	0.644978	0.41	0.683	-1.00408	1.5313
	Serine	0.315524	3.30624	0.1	0.924	-6.18284	6.81389	-0.620402	2.15149	-0.29	0.7732	-4.84911	3.60831	0.938851	1.38081	0.68	0.4969	-1.77511	3.65281	0.130978	4.10322	0.03	0.9745	-7.93384	8.1958	0.0792587	0.957816	0.08	0.9341	-1.80331	1.96183
	Taurine	-0.480552	2.64733	-0.18	0.856	-5.68383	4.72273	-0.351996	1.72284	-0.2	0.8382	-3.73821	3.03422	0.788888	1.1056	0.71	0.4759	-1.38414	2.96192	-0.965334	3.28524	-0.29	0.769	-7.42243	5.49176	0.350143	0.766771	0.46	0.6482	-1.15693	1.85722
	Threonine	-1.83547	2.44967	-0.75	0.4541	-6.65025	2.97932	-2.39052	1.5911	-1.5	0.1337	-5.5178	0.736764	-0.150105	1.02425	-0.15	0.8836	-2.16326	1.86305	-0.220275	3.04211	-0.07	0.9423	-6.19948	5.75893	0.464905	0.709775	0.66	0.5128	-0.930145	1.85996
	Tryptophan	0.77772	1.18316	0.66	0.5113	-1.54775	3.1032	-0.8522	0.769279	-1.11	0.2686	-2.36421	0.659806	0.00738292	0.494639	0.01	0.9881	-0.964821	0.979587	-0.168676	1.46906	-0.11	0.9086	-3.05609	2.71874	-0.0497703	0.342922	-0.15	0.8847	-0.723778	0.624238
	Tyrosine	-2.79918	2.19536	-1.28	0.203	-7.11413	1.51577	-1.56299	1.42943	-1.09	0.2748	-4.37252	1.24654	-0.630939	0.918575	-0.69	0.4925	-2.43638	1.1745	-0.421005	2.7296	-0.15	0.8775	-5.78598	4.94397	0.50548	0.636726	0.79	0.4277	-0.745995	1.75695
	Urea	1.83308	2.16877	0.85	0.3985	-2.4296	6.09576	0.627536	1.41226	0.44	0.657	-2.14824	3.40331	1.3652	0.904601	1.51	0.132	-0.412778	3.14318	1.09358	2.69325	0.41	0.6849	-4.19995	6.38712	0.044685	0.628806	0.07	0.9434	-1.19122	1.28059
	Valine	-1.82711	2.62067	-0.7	0.4861	-6.978	3.32378	-1.29325	1.70534	-0.76	0.4487	-4.64506	2.05856	0.159388	1.09566	0.15	0.8844	-1.99411	2.31289	0.346722	3.25416	0.11	0.9152	-6.04927	6.74272	0.631028	0.759025	0.83	0.4062	-0.860823	2.12288
	trans-4-Hydroxy-L-proline	4.25831	2.24566	1.9	0.0586	-0.155502	8.67213	-0.778509	1.46706	-0.53	0.5959	-3.662	2.10498	0.353652	0.94212	0.38	0.7076	-1.49807	2.20537	-0.926132	2.79821	-0.33	0.7408	-6.42597	4.5737	0.365296	0.653037	0.56	0.5762	-0.918237	1.64883
Ketone Body	3-Hydroxybutyrate	0.0849776	0.845831	0.1	0.92	-1.57749	1.74744	-0.809538	0.549083	-1.47	0.1411	-1.88875	0.269675	0.0728401	0.353424	0.21	0.8368	-0.621808	0.767489	0.418797	1.04953	0.4	0.6901	-1.64404	2.48163	0.0653174	0.245019	0.27	0.7899	-0.416263	0.546898
	Acetoacetate	0.799896	0.622703	1.28	0.1996	-0.424016	2.02381	0.121084	0.405983	0.3	0.7657	-0.676868	0.919036	0.587956	0.259156	2.27	0.0238	0.0785893	1.09732	0.734818	0.773469	0.95	0.3426	-0.785423	2.25506	0.0467113	0.180727	0.26	0.7962	-0.308505	0.401927
	Acetone	1.93764	1.92187	1.01	0.3139	-1.83976	5.71504	-1.01683	1.25125	-0.81	0.4169	-3.47614	1.44248	0.885113	0.802882	1.1	0.2709	-0.692938	2.46316	1.53887	2.38678	0.64	0.5194	-3.1523	6.23004	-0.106878	0.557394	-0.19	0.848	-1.20243	0.988671
TCA	2-Oxoglutarate	0.400596	1.75473	0.23	0.8195	-3.0483	3.84949	0.0126306	1.14203	0.01	0.9912	-2.23202	2.25728	0.565918	0.732766	0.77	0.4404	-0.874322	2.00616	-0.322128	2.17778	-0.15	0.8825	-4.60251	3.95825	0.396726	0.508015	0.78	0.4353	-0.601769	1.39522
	cis-Aconitate	0.267067	1.62199	0.16	0.8693	-2.92093	3.45506	0.554142	1.05527	0.53	0.5998	-1.51998	2.62826	0.171823	0.677732	0.25	0.8	-1.16025	1.50389	-1.58621	2.01157	-0.79	0.4308	-5.53992	2.36751	0.359404	0.469584	0.77	0.4445	-0.563556	1.28236
	Fumarate	-1.95996	1.9012	-1.03	0.3032	-5.69673	1.77681	-1.02011	1.23783	-0.82	0.4103	-3.45305	1.41283	-0.164898	0.795369	-0.21	0.8359	-1.72818	1.39839	0.0741998	2.36237	0.03	0.975	-4.569	4.7174	0.484453	0.550959	0.88	0.3797	-0.598447	1.56735
	Succinate	-2.44786	1.83827	-1.33	0.1837	-6.06095	1.16523	-1.53453	1.19651	-1.28	0.2004	-3.88624	0.817186	-0.53187	0.769287	-0.69	0.4897	-2.04389	0.98015	-1.18639	2.28534	-0.52	0.6039	-5.6782	3.30541	0.300671	0.533442	0.56	0.5733	-0.747799	1.34914
Creatine/ Creatinine	Creatine	2.20971	2.78296	0.79	0.4276	-3.26015	7.67958	-0.0848086	1.81245	-0.05	0.9627	-3.64714	3.47752	0.372751	1.16359	0.32	0.7489	-1.91427	2.65977	1.84915	3.45515	0.54	0.5928	-4.94189	8.64019	-0.293224	0.806685	-0.36	0.7164	-1.87875	1.2923
	Creatinine	2.44358	3.7166	0.66	0.5112	-4.86132	9.74849	0.663008	2.41973	0.27	0.7842	-4.09293	5.41895	2.46368	1.54925	1.59	0.1125	-0.581344	5.5087	-0.977499	4.61453	-0.21	0.8323	-10.0473	8.09227	-0.430784	1.07703	-0.4	0.6894	-2.54767	1.68611
Glycolysis	Lactate	-2.37658	1.53472	-1.55	0.1222	-5.39305	0.639891	-0.749327	1.00091	-0.75	0.4545	-2.71659	1.21794	-0.284135	0.642931	-0.44	0.6588	-1.54781	0.979536	-0.123963	1.90994	-0.06	0.9483	-3.87791	3.62999	0.275279	0.445645	0.62	0.5371	-0.600628	1.15119
	Pyruvate	1.04643	1.03057	1.02	0.3105	-0.979134	3.07199	-0.0261102	0.671484	-0.04	0.969	-1.3459	1.29368	0.421777	0.430666	0.98	0.328	-0.42469	1.26824	-0.183395	1.28048	-0.14	0.8862	-2.70015	2.33336	0.0589052	0.298897	0.2	0.8439	-0.528572	0.646383
Others	Acetate	1.10875	1.12987	0.98	0.327	-1.112	3.32949	0.235438	0.736045	0.32	0.7492	-1.21125	1.68212	-0.498255	0.472044	-1.06	0.2918	-1.42605	0.429539	1.5953	1.40168	1.14	0.2557	-1.15968	4.35028	0.232184	0.327497	0.71	0.4787	-0.411507	0.875874
	Choline	-1.33239	2.64421	-0.5	0.6146	-6.52954	3.86476	1.92606	1.71883	1.12	0.2631	-1.45227	5.3044	0.248075	1.10516	0.22	0.8225	-1.92411	2.42026	3.27236	3.27876	1	0.3188	-3.17198	9.7167	0.812094	0.76525	1.06	0.2892	-0.691993	2.31618
	Dimethyl Sulfone	-0.286359	1.47279	-0.19	0.8459	-3.1811	2.60838	0.701269	0.957924	0.73	0.4645	-1.18151	2.58405	0.0533862	0.615437	0.09	0.9309	-1.15625	1.26302	1.99897	1.82534	1.1	0.2741	-1.5887	5.58663	-0.208672	0.426565	-0.49	0.625	-1.04708	0.629735
	Formate	-2.4417	2.54996	-0.96	0.3388	-7.45361	2.5702	-2.44934	1.65706	-1.48	0.1401	-5.70627	0.807583	0.106772	1.06664	0.1	0.9203	-1.98969	2.20324	-3.70643	3.16294	-1.17	0.2419	-9.92313	2.51028	-0.536939	0.739053	-0.73	0.4679	-1.98953	0.915656
	Glycolate	-3.95207	2.55438	-1.55	0.1226	-8.97267	1.06852	-2.16521	1.66371	-1.3	0.1938	-5.43521	1.10479	-0.494125	1.07006	-0.46	0.6445	-2.59732	1.60907	-4.77643	3.17055	-1.51	0.1327	-11.0081	1.45524	-0.568516	0.741547	-0.77	0.4437	-2.02601	0.888983
	Hypoxanthine	-1.53573	0.720089	-2.13	0.0335	-2.95105	-0.120408	-0.480394	0.470525	-1.02	0.3078	-1.4052	0.444415	-0.586452	0.301156	-1.95	0.0521	-1.17837	0.00546554	-1.37378	0.895924	-1.53	0.1259	-3.1347	0.387144	-0.36244	0.208979	-1.73	0.0836	-0.773184	0.0483035
	myo Inositol	-0.0718254	2.22935	-0.03	0.9743	-4.45358	4.30993	1.68869	1.44856	1.17	0.2444	-1.15843	4.53581	-0.0717171	0.931546	-0.08	0.9387	-1.90266	1.75922	1.8442	2.7653	0.67	0.5052	-3.59094	7.27934	-0.304997	0.645673	-0.47	0.6369	-1.57406	0.964064
